# Supplementary material for: Differential Relationship between Tobacco Control Policies and U.S. Adult Current Smoking by Poverty
Source: MDPI journal article supplement (doi:10.3390/ijerph16214130), 2019-10-26
Supplement: s1 [file s1]

**Supplementary Table 1.** Results of sensitivity analyses for survey year and imputed income for multivariable logistic regression models with interaction terms using data from 1985-2015 supplements to the U.S. Census Current Population Survey with imputed income and defining poverty as 138% of the poverty line unless otherwise noted).

|                                                              | Data from only 1992-2015 supplements |                                | Dropped participants with missing income |                                | Alternate definition of poverty as 150% of poverty line |                        |
|--------------------------------------------------------------|--------------------------------------|--------------------------------|------------------------------------------|--------------------------------|---------------------------------------------------------|------------------------|
|                                                              | Model 1                              | Model 2                        | Model 3                                  | Model 4                        | Model 5                                                 | Model 6                |
|                                                              | Coeff (95%CI)                        | Coeff (95%CI)                  | Coeff (95%CI)                            | Coeff (95%CI)                  | Coeff (95%CI)                                           | Coeff (95%CI)          |
| Poverty                                                      | 0.33 (0.31, 0.36) <sup>1</sup>       | 0.31 (0.29, 0.33) <sup>1</sup> | 0.35 (0.33, 0.38) <sup>1</sup>           | 0.33 (0.31, 0.35) <sup>1</sup> | 0.32 (0.30, 0.34)                                       | 0.30 (0.28, 0.32)      |
| Smoke-free law coverage (SFALs) <sup>2</sup>                 |                                      |                                |                                          |                                |                                                         |                        |
| % state covered by workplace, bar, and restaurant laws (All) | -0.04 (-0.07, -0.01)                 | -                              | -0.04 (-0.07, -0.01)                     | -                              | -0.04 (-0.07, -0.01)                                    | -                      |
| % state covered by workplace laws (WP)                       | -                                    | -0.02 (-0.05, 0.02)            | -                                        | -0.01 (-0.04, 0.02)            | -                                                       | -0.01 (-0.04, 0.03)    |
| % of state covered by restaurant and/or bar laws (RB)        | -                                    | -0.04 (-0.07, -0.01)           | -                                        | -0.04 (-0.07, -0.01)           | -                                                       | -0.05 (-0.08, -0.02)   |
| Poverty * SFAL-All                                           | 0.08 (0.02, 0.13)                    | -                              | 0.07 (0.01, 0.13)                        | -                              | 0.09 (0.04, 0.15)                                       | -                      |
| Poverty * SFAL-WP                                            | -                                    | 0.09 (0.02, 0.15)              | -                                        | 0.09 (0.03, 0.15)              | -                                                       | 0.09 (0.03, 0.15)      |
| Poverty * SFAL-RB                                            | -                                    | -0.14 (-0.19, -0.09)           | -                                        | -0.15 (-0.20, -0.10)           | -                                                       | -0.13 (-0.17, -0.08)   |
| Per-pack state cigarette tax (\$)³                           | -0.06 (-0.07, -0.05)                 | -0.06 (-0.07, -0.04)           | -0.07 (-0.08, -0.05)                     | -0.06 (-0.07, -0.05)           | -0.06 (-0.07, -0.05)                                    | -0.05 (-0.07, -0.04)   |
| Poverty * Tax                                                | -0.01 (-0.03, 0.01)                  | 0.01 (-0.01, 0.03)             | -0.01 (-0.03, 0.01)                      | 0.02 (-0.01, 0.04)             | -0.01 (-0.03, 0.01)                                     | 0.01 (-0.01, 0.03)     |
| Per capita tobacco control funding- 5% discount (\$)⁴        | -0.002 (-0.01, 0.003)                | -0.003 (-0.01, 0.002)          | -0.01 (-0.01, 0.0001)                    | -0.004 (-0.01, 0.001)          | -0.01 (-0.01, -0.001)                                   | -0.01 (-0.01, -0.0002) |
| Poverty * TCF                                                | -0.003 (-0.01, 0.004)                | 0.01 (-0.001, 0.01)            | 0.001 (-0.01, 0.01)                      | 0.01 (0.003, 0.02)             | -0.0003 (-0.01, 0.01)                                   | 0.01 (0.001, 0.02)     |
| Age                                                          | 0.11 (0.11, 0.12)                    | 0.11 (0.11, 0.12)              | 0.11 (0.11, 0.12)                        | 0.11 (0.11, 0.12)              | 0.11 (0.11, 0.11)                                       | 0.11 (0.11, 0.11)      |

|                        |                         |                         |                         |                         |                         |                         |
|------------------------|-------------------------|-------------------------|-------------------------|-------------------------|-------------------------|-------------------------|
| Age <sup>2</sup>       | -0.001 (-0.001, -0.001) | -0.001 (-0.001, -0.001) | -0.001 (-0.001, -0.001) | -0.001 (-0.001, -0.001) | -0.001 (-0.001, -0.001) | -0.001 (-0.001, -0.001) |
| Race                   |                         |                         |                         |                         |                         |                         |
| Non-Hispanic white     | <i>Ref</i>              | <i>Ref</i>              | <i>Ref</i>              | <i>Ref</i>              | <i>Ref</i>              | <i>Ref</i>              |
| Non-Hispanic black     | -0.54 (-0.55, -0.52)    | -0.54 (-0.55, -0.52)    | -0.50 (-0.52, -0.49)    | -0.50 (-0.52, -0.49)    | -0.50 (-0.52, -0.49)    | -0.50 (-0.52, -0.49)    |
| Hispanic               | -0.92 (-0.93, -0.90)    | -0.91 (-0.93, -0.89)    | -0.90 (-0.92, -0.88)    | -0.90 (-0.92, -0.88)    | -0.90 (-0.92, -0.88)    | -0.90 (-0.92, -0.88)    |
| Non-Hispanic other     | -0.35 (-0.38, -0.33)    | -0.35 (-0.38, -0.33)    | -0.35 (-0.37, -0.32)    | -0.35 (-0.37, -0.32)    | -0.36 (-0.38, -0.34)    | -0.36 (-0.38, -0.34)    |
| Educational attainment |                         |                         |                         |                         |                         |                         |
| No high school         | -0.02 (-0.05, -0.002)   | -0.02 (-0.04, -0.002)   | 0.01 (-0.01, 0.03)      | 0.02 (-0.01, 0.04)      | 0.02 (-0.002, 0.04)     | 0.02 (-0.001, 0.04)     |
| High school dropout    | 0.41 (0.39, 0.42)       | 0.41 (0.39, 0.42)       | 0.42 (0.40, 0.43)       | 0.42 (0.40, 0.43)       | 0.42 (0.41, 0.43)       | 0.42 (0.41, 0.43)       |
| High school graduate   | <i>Ref</i>              | <i>Ref</i>              | <i>Ref</i>              | <i>Ref</i>              | <i>Ref</i>              | <i>Ref</i>              |
| Some college           | -0.37 (-0.38, -0.36)    | -0.37 (-0.38, -0.36)    | -0.37 (-0.38, -0.36)    | -0.37 (-0.38, -0.36)    | -0.36 (-0.37, -0.35)    | -0.36 (-0.37, -0.35)    |
| College graduate       | -1.24 (-1.26, -1.23)    | -1.24 (-1.26, -1.23)    | -1.23 (-1.24, -1.22)    | -1.23 (-1.24, -1.22)    | -1.21 (-1.22, -1.20)    | -1.21 (-1.22, -1.20)    |
| Marital Status         |                         |                         |                         |                         |                         |                         |
| Married                | <i>Ref</i>              | <i>Ref</i>              | <i>Ref</i>              | <i>Ref</i>              | <i>Ref</i>              | <i>Ref</i>              |
| Divorced               | 0.75 (0.74, 0.76)       | 0.75 (0.74, 0.76)       | 0.73 (0.72, 0.75)       | 0.73 (0.72, 0.74)       | 0.74 (0.73, 0.75)       | 0.74 (0.72, 0.75)       |
| Widowed                | 0.43 (0.41, 0.45)       | 0.43 (0.41, 0.45)       | 0.40 (0.38, 0.43)       | 0.40 (0.38, 0.43)       | 0.41 (0.39, 0.43)       | 0.41 (0.39, 0.43)       |
| Separated              | 0.75 (0.73, 0.78)       | 0.75 (0.72, 0.78)       | 0.73 (0.70, 0.75)       | 0.73 (0.70, 0.75)       | 0.74 (0.711, 0.76)      | 0.74 (0.71, 0.76)       |
| Never married          | 0.37 (0.35, 0.38)       | 0.36 (0.35, 0.38)       | 0.34 (0.32, 0.35)       | 0.34 (0.32, 0.35)       | 0.34 (0.32, 0.35)       | 0.34 (0.32, 0.35)       |
| Employment             |                         |                         |                         |                         |                         |                         |
| Working                | <i>Ref</i>              | <i>Ref</i>              | <i>Ref</i>              | <i>Ref</i>              | <i>Ref</i>              | <i>Ref</i>              |
| Unemployed             | 0.46 (0.44, 0.48)       | 0.46 (0.44, 0.48)       | 0.44 (0.42, 0.46)       | 0.44 (0.42, 0.46)       | 0.45 (0.43, 0.47)       | 0.45 (0.43, 0.47)       |
| Not in labor force     | -0.07 (-0.09, -0.06)    | -0.07 (-0.09, -0.06)    | -0.09 (-0.10, -0.08)    | -0.09 (-0.10, -0.08)    | -0.09 (-0.10, -0.08)    | -0.09 (-0.10, -0.08)    |

1 Poverty was defined as living below 138% of the poverty line versus living at or above 138% of the poverty line. 2 Includes 100% workplace, restaurant, and bar laws. Information obtained from the Americans for Nonsmokers Rights Foundation. 3 Obtained from the Tax Burden of Tobacco. Adjusted for inflation to 2015 dollars using the Consumer Price Index [52]. 4 State-level funding obtained from RTI International's database, calculated at a 5% discount.
